# Supplementary material for: Coadministration of rapamycin with a DNA/MVA SIV vaccine improves memory CD8+ T cell response
Source: JCI journal article supplement (doi:10.1172/jci.insight.193752), 2026-04-23
Supplement: sd1 [file 1]

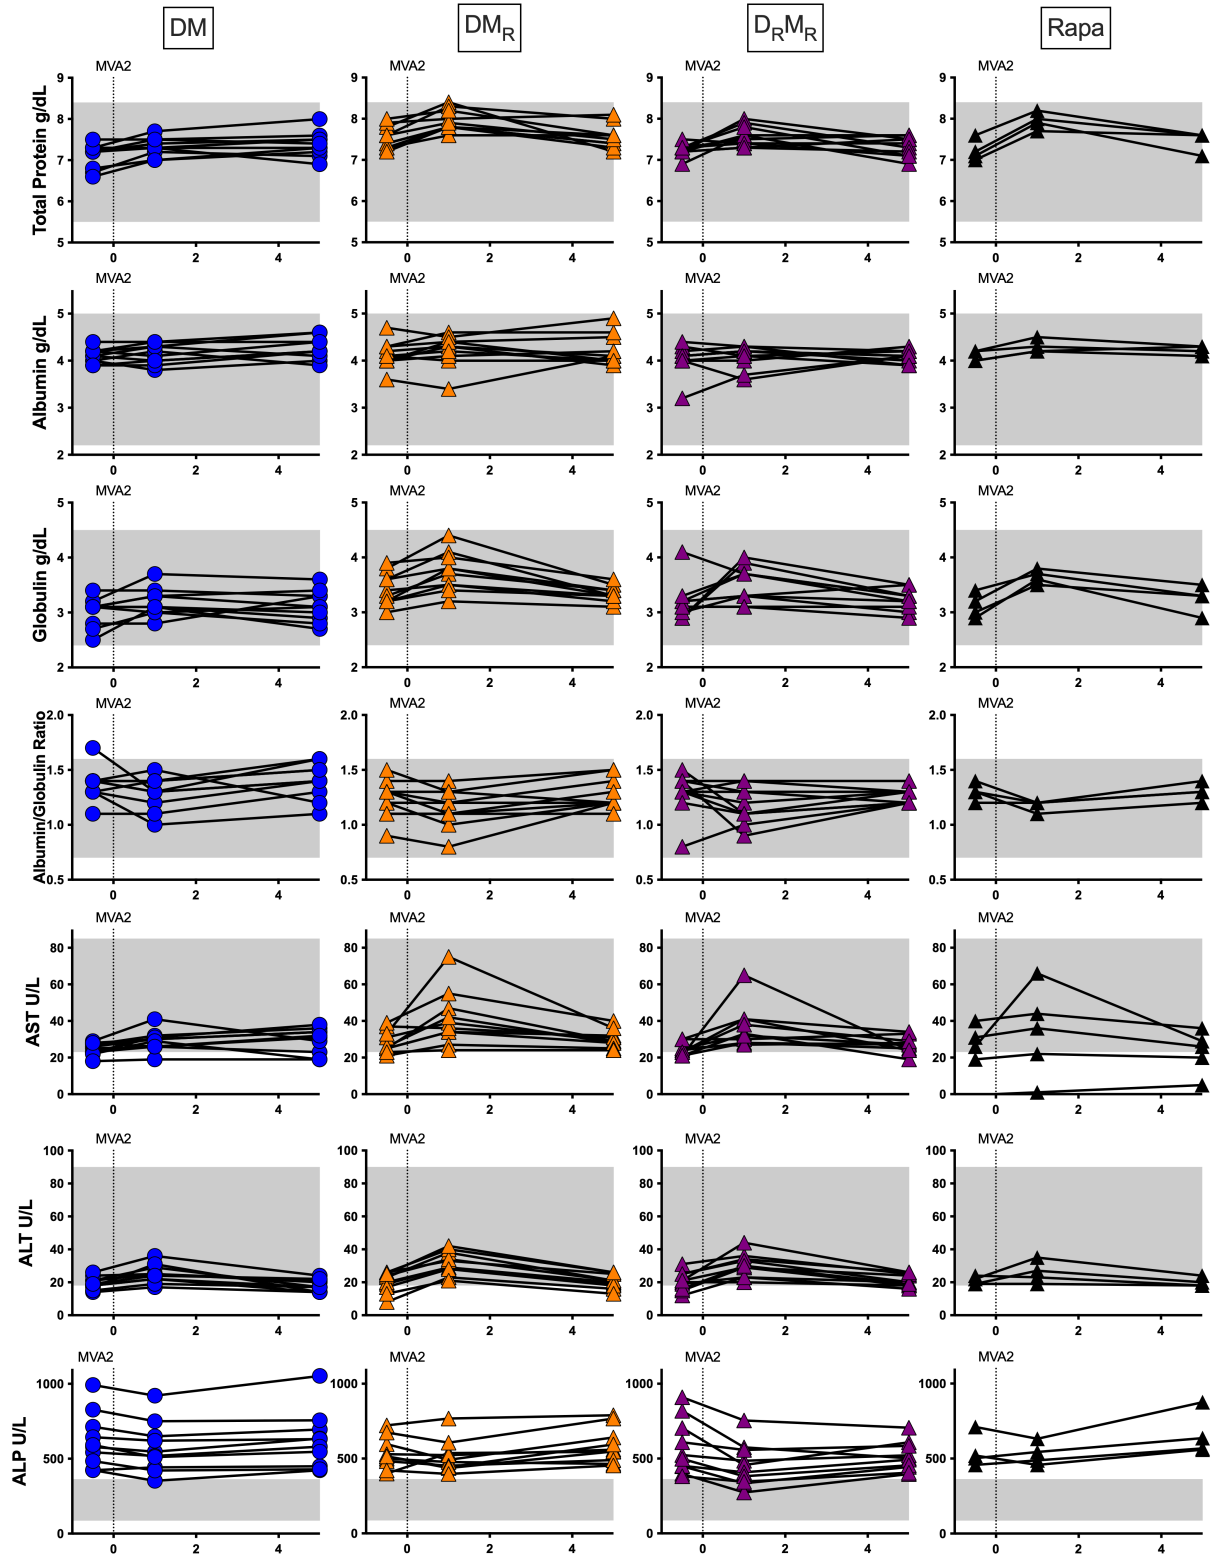

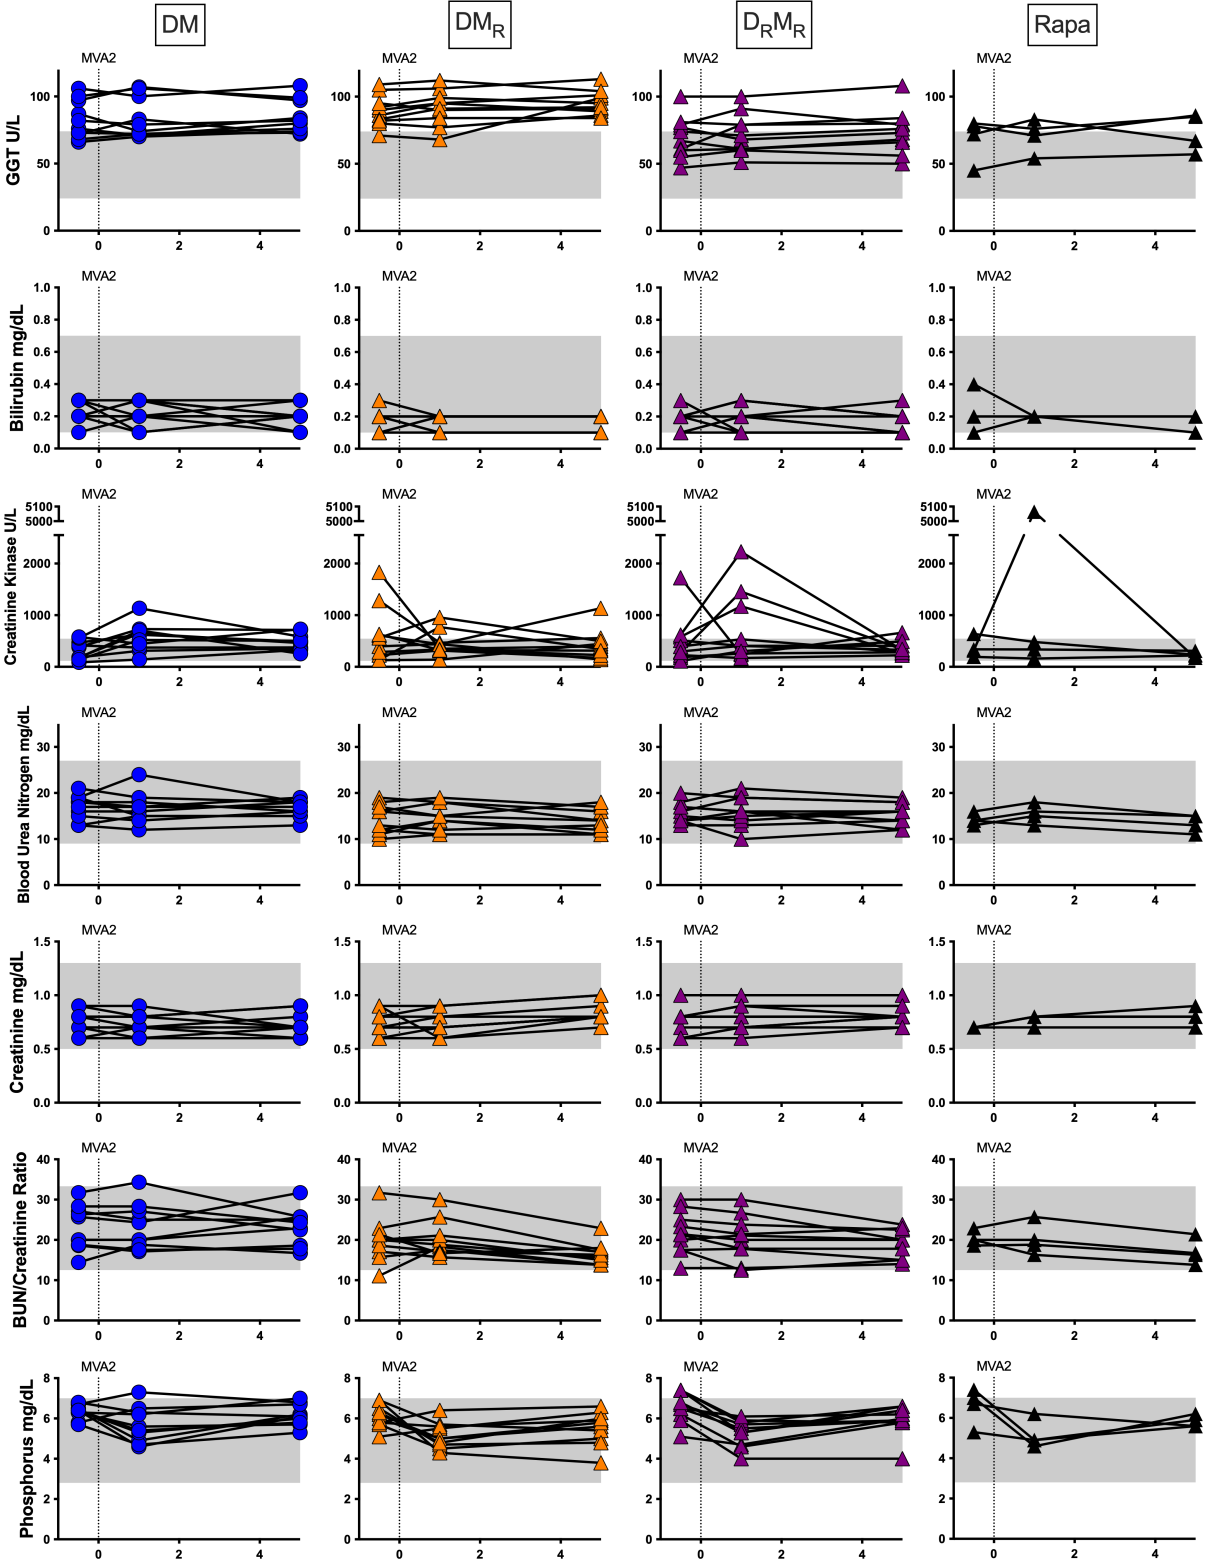

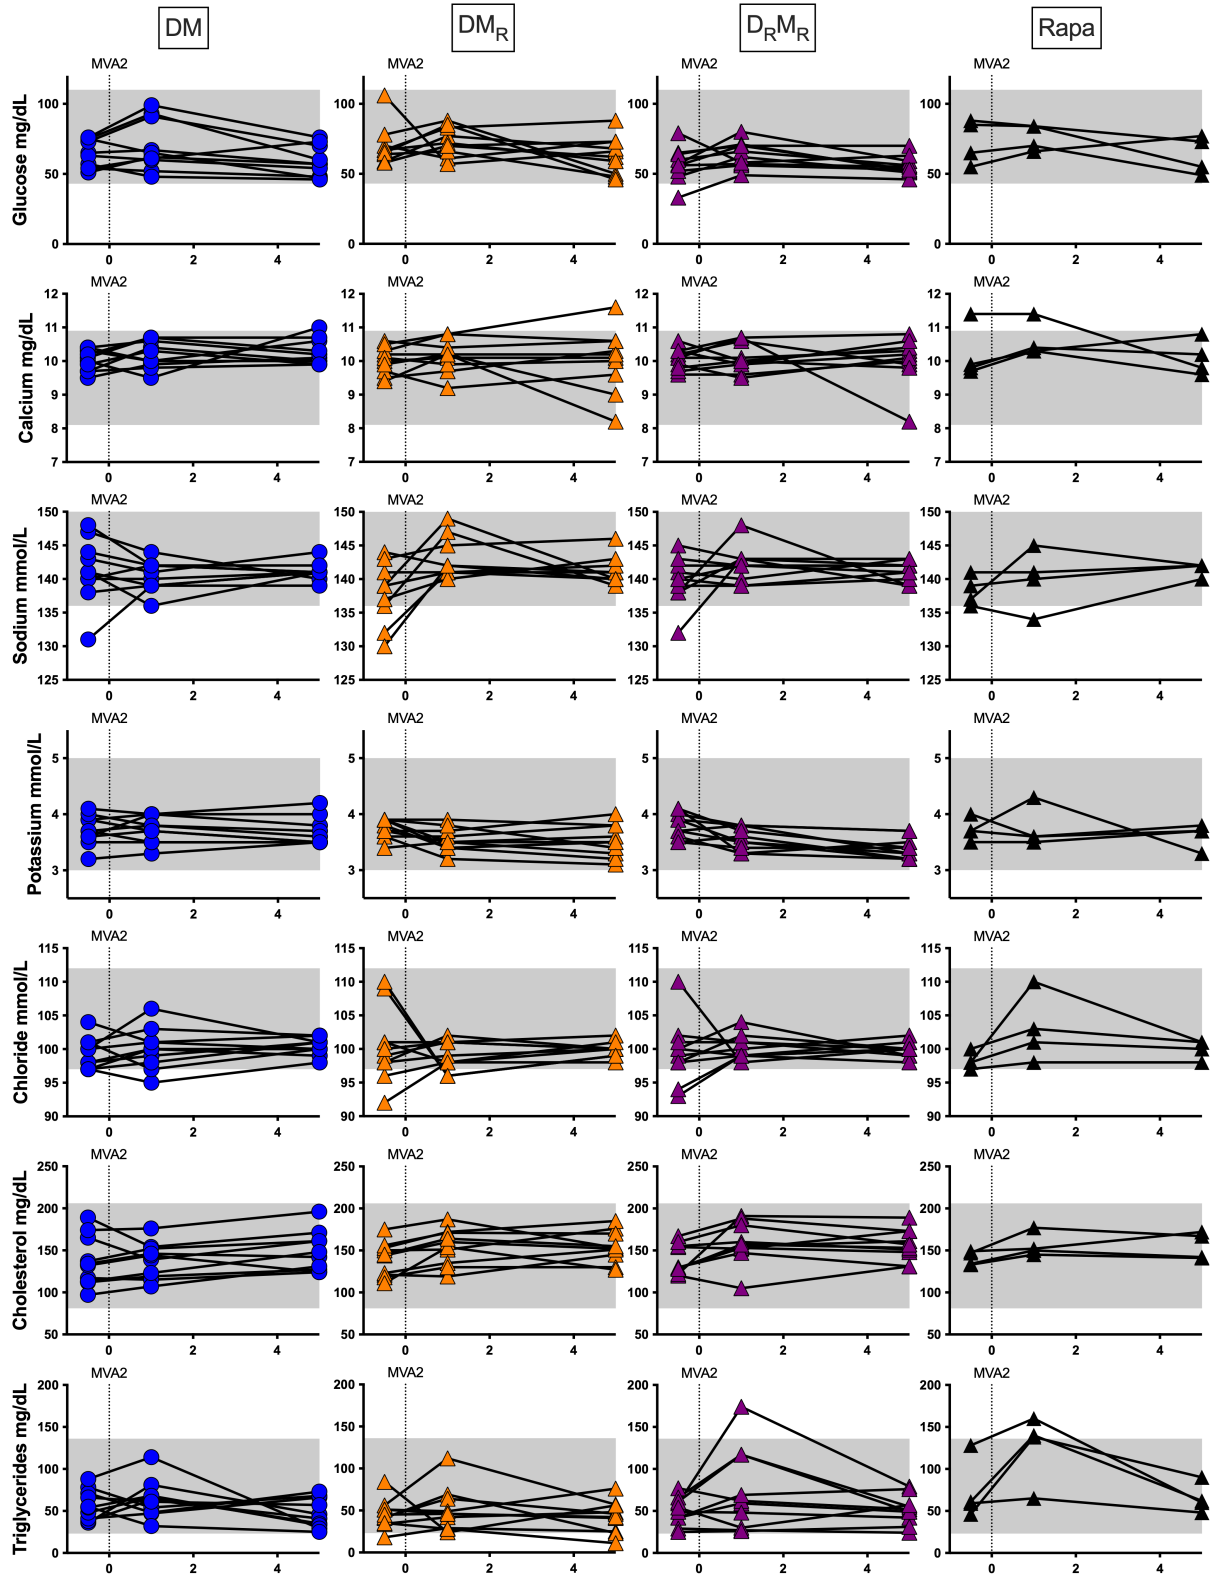

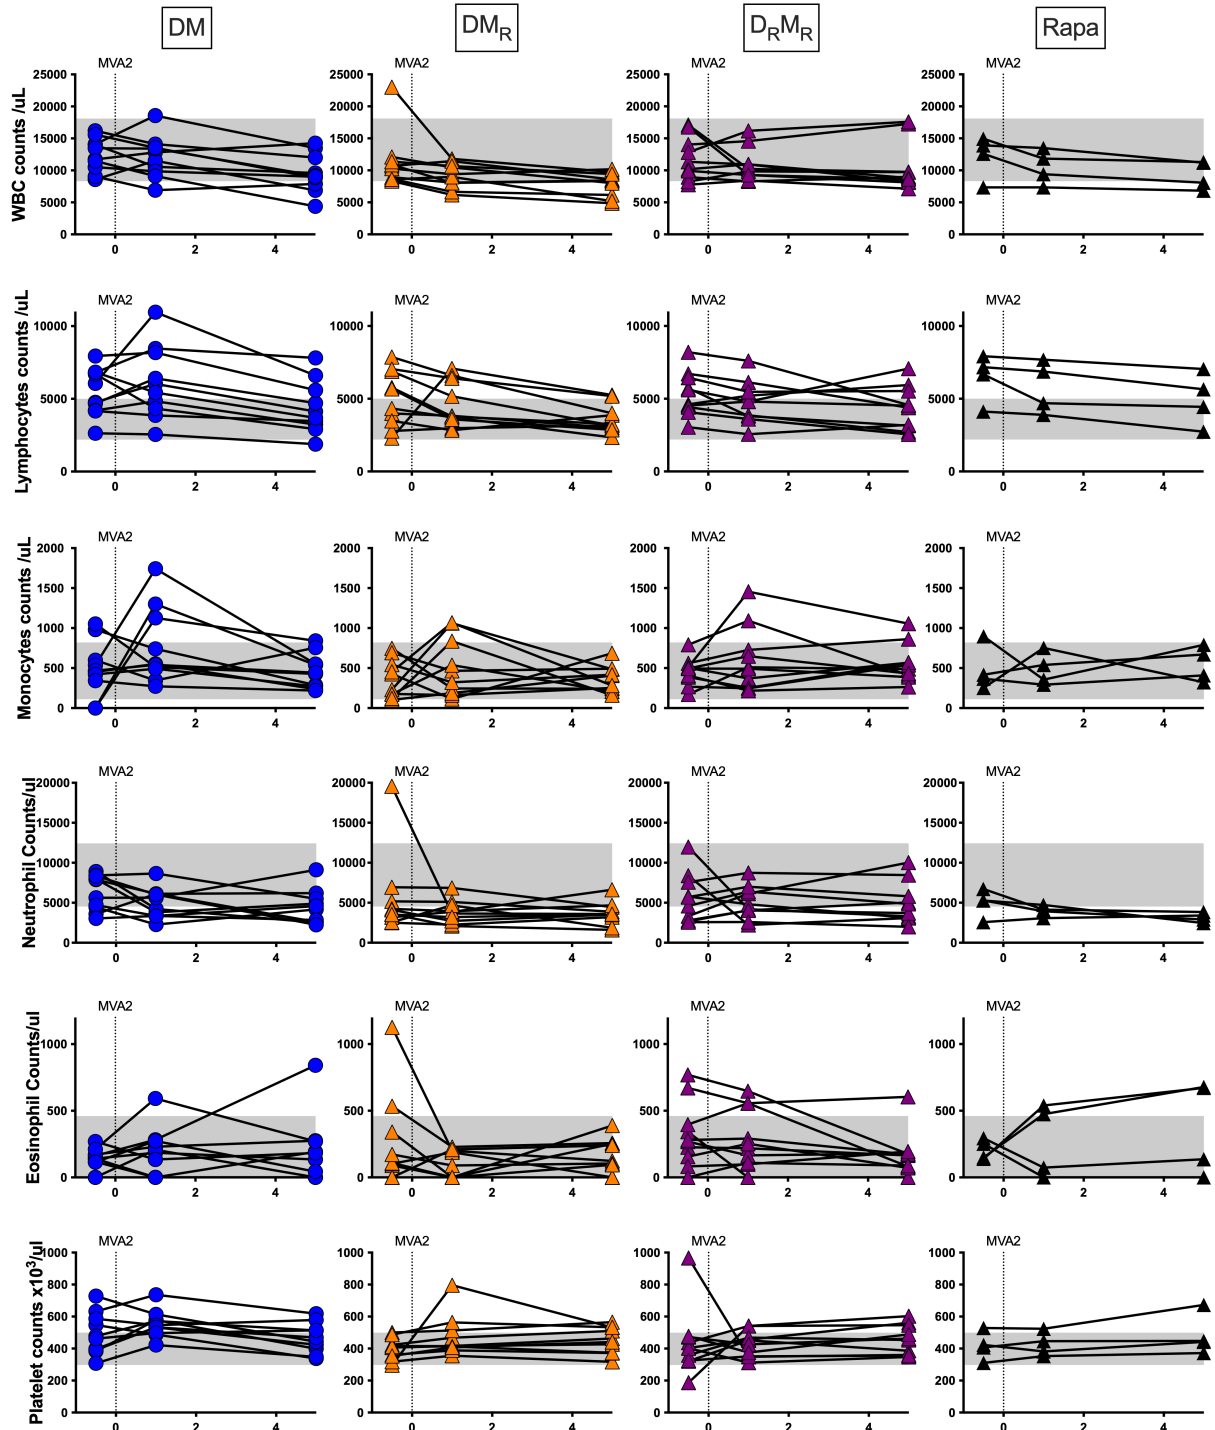

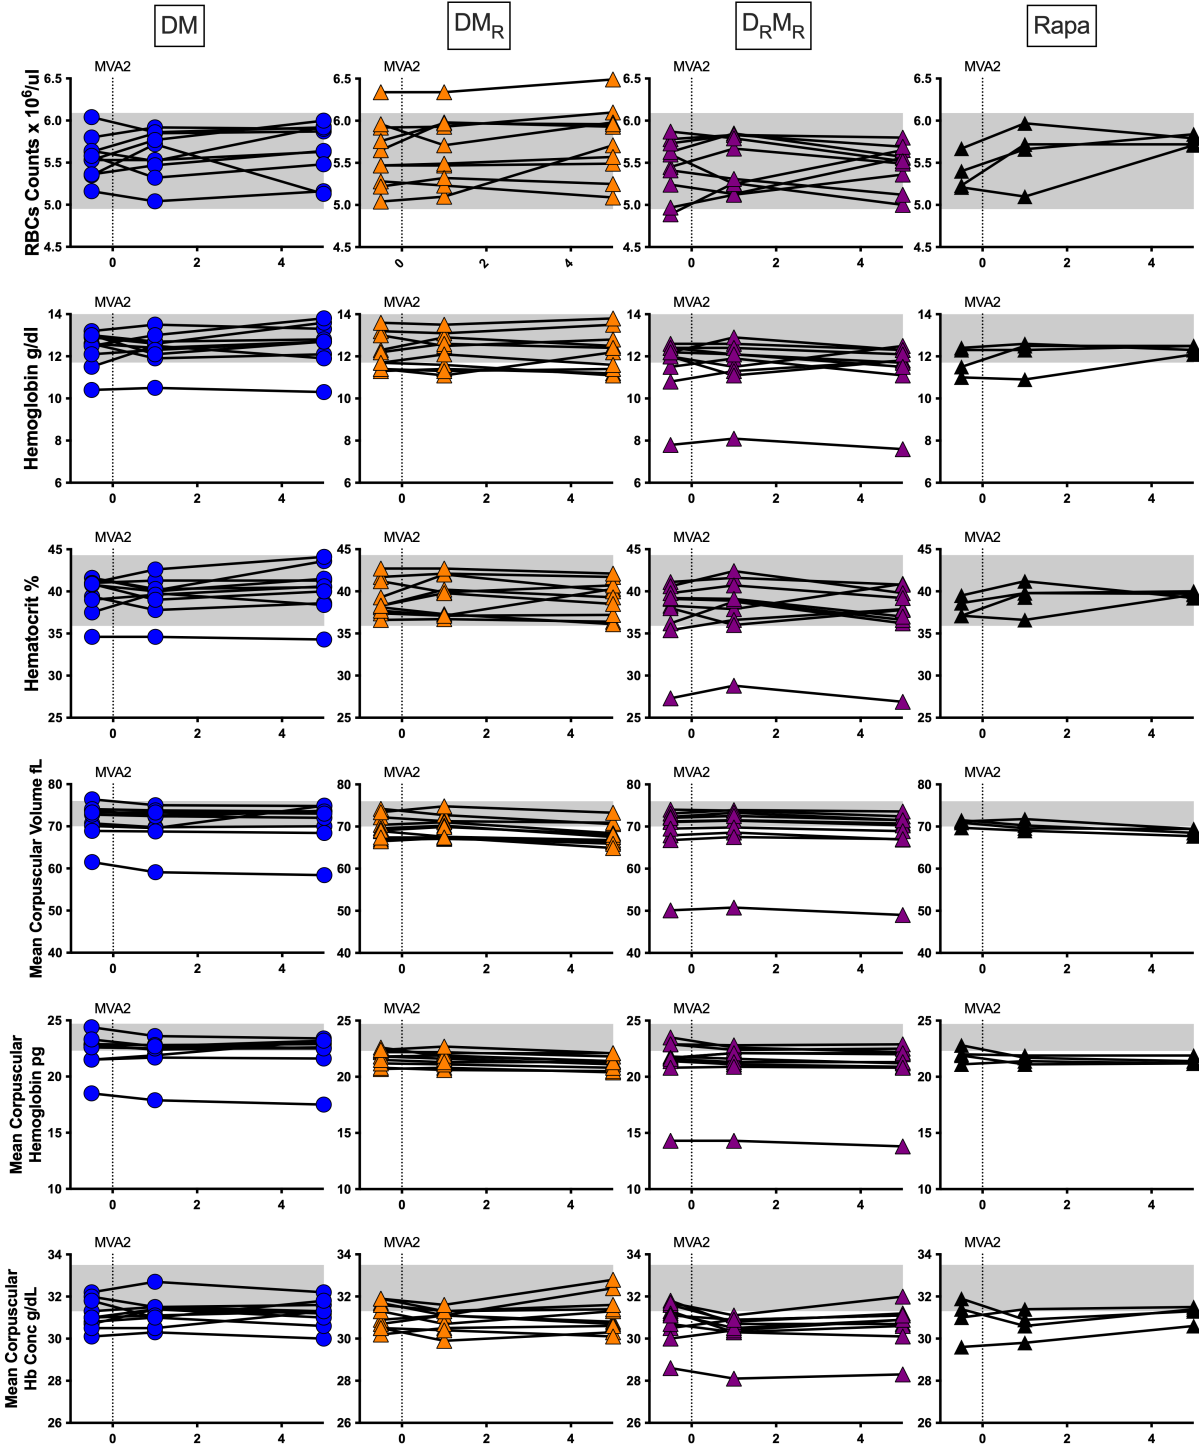

**Figure S1. Rapamycin treatment does not alter blood chemistry or hematology profiles.**

Blood chemistry, liver enzymes, kidney enzymes, and hematology following the second MVA.

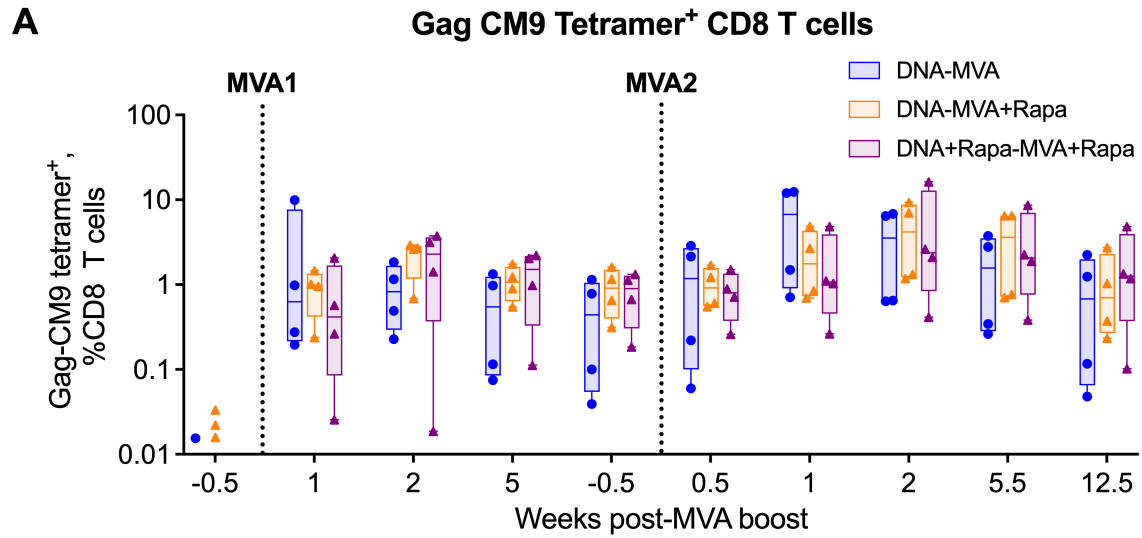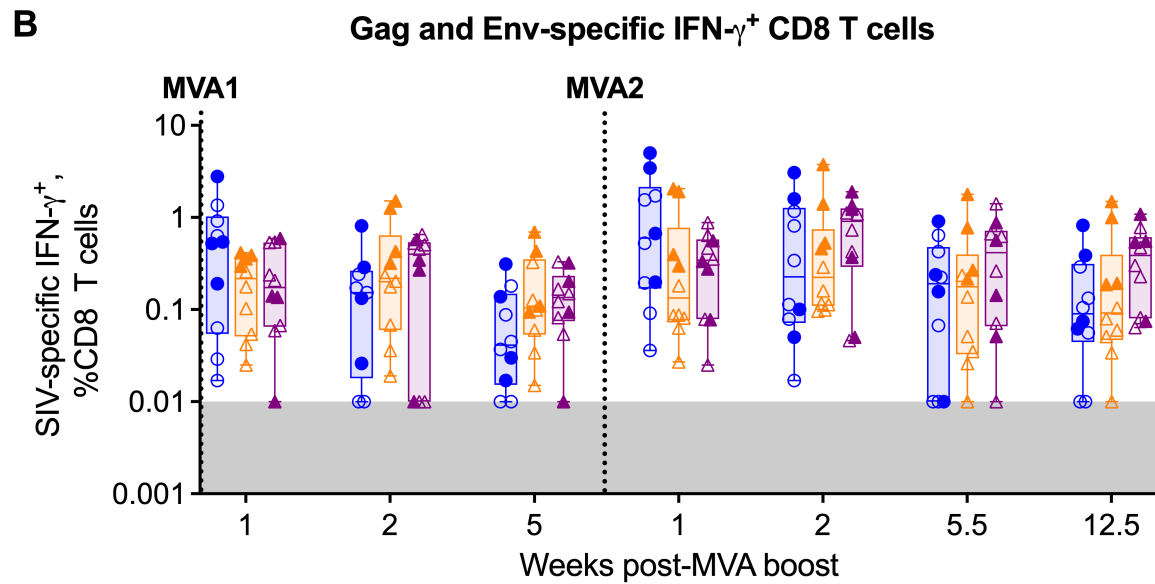

**Figure S2. Rapamycin treatment delays peak and reduces Gag- and Env- specific tetramer cells.** **A.** Frequency of Gag-CM9 tetramer<sup>+</sup> CD8 T cells shown individually after MVA vaccinations (n = 4/group). **B.** Frequency of SIV-specific IFN- $\gamma$ <sup>+</sup> CD8 T cells shown individually after MVA vaccinations (n = 10/group).

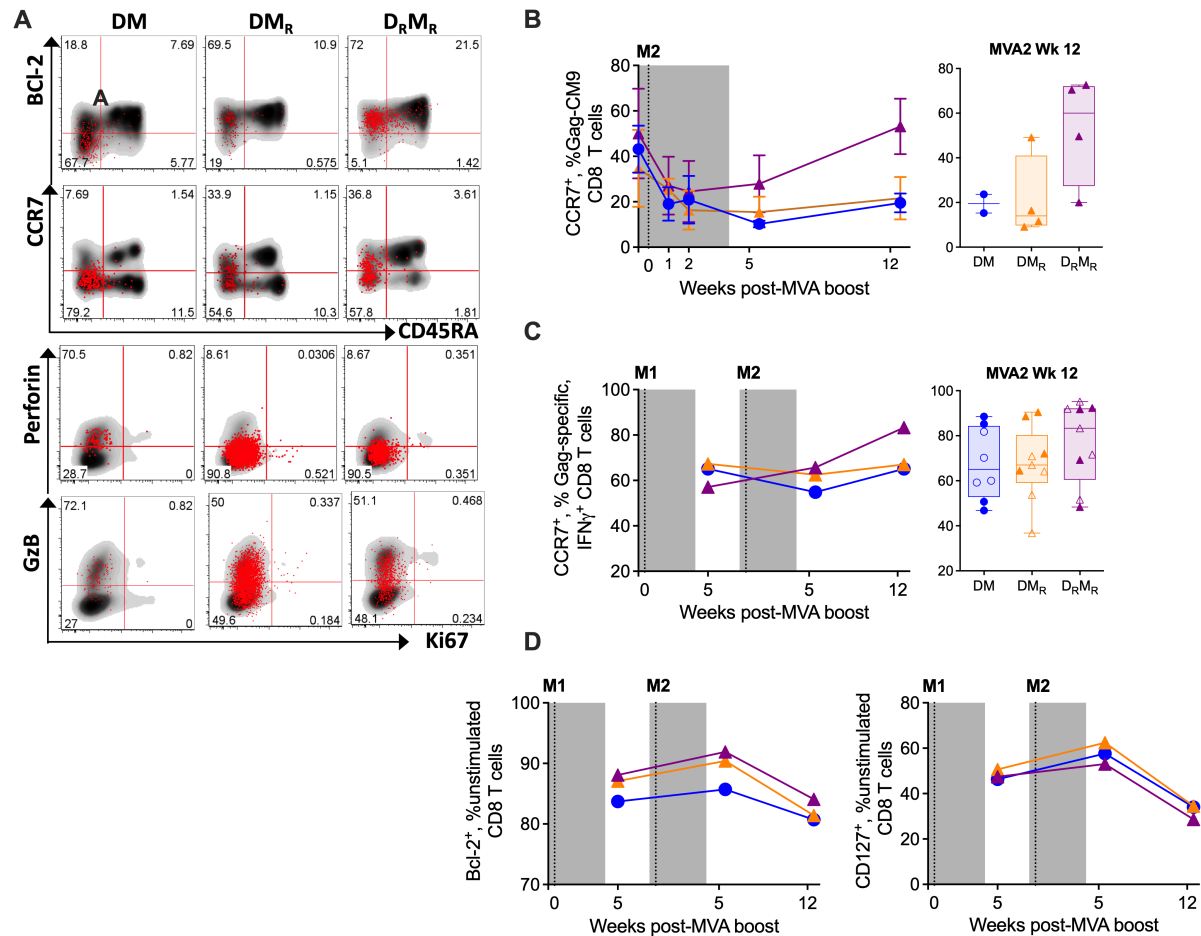

**Figure S3. Rapamycin specifically enhances Bcl-2 and CD127 expression in vaccine-induced CD8 T cells.** **A.** Representative flow plots of Bcl-2 and CCR7 against CD45RA, and Perforin and GzB against Ki67 on total CD8 T cells (black and gray density plot) and tetramer<sup>+</sup> CD8 T cells (red dots). **B.** Geometric means of CCR7<sup>+</sup> frequencies on Gag-CM9 specific tetramer<sup>+</sup> CD8 T cells measured temporally post-MVA2. Individual data at MVA2 week 12 (n = 4/group). **C.** Geometric means of CCR7<sup>+</sup> frequencies on Gag-specific IFN- $\gamma$ <sup>+</sup> CD8 T cells measured temporally post-MVA vaccinations. Individual data at MVA2 week 12 (n = 10/group). **D.** Geometric means of Bcl-2<sup>+</sup> and CD127<sup>+</sup> frequencies on total CD8 T cells measured temporally post-MVA vaccinations. Statistics: Unpaired, non-parametric Mann-Whitney tests were used to compare marker<sup>+</sup> frequencies between groups.

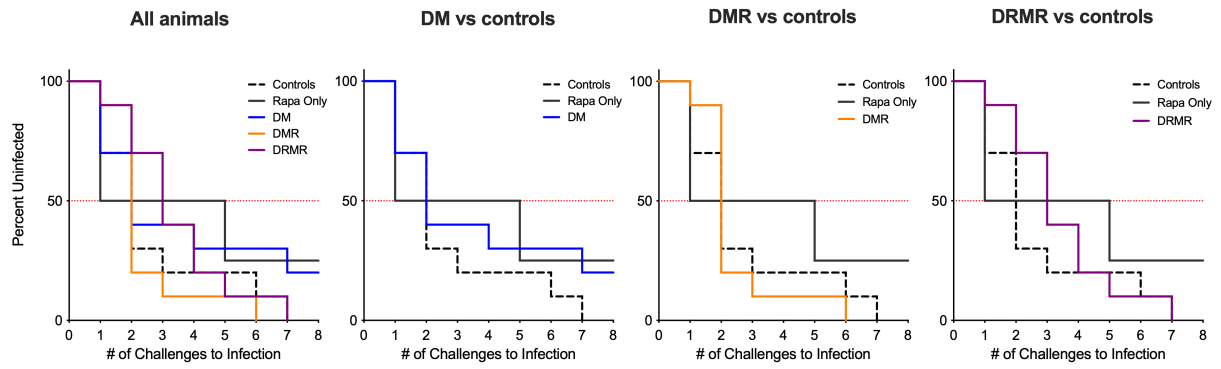

**Figure S4. Kaplan-Meier Acquisition Curve.** Infection curve for all groups. Statistics: Log-rank (Mantel-Cox) test.

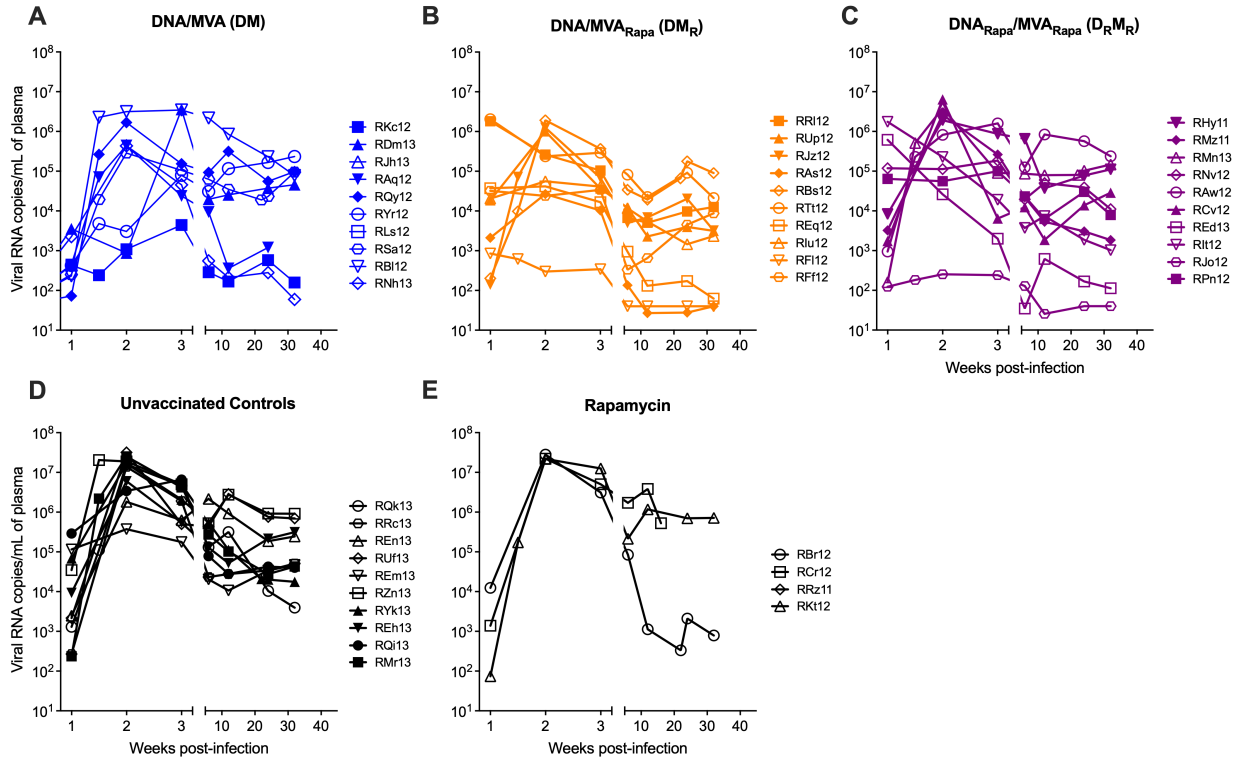

**Figure S5. Viral load data of individual animals across all experimental groups. A–E.** Plasma viral load data for individual macaques belonging to groups in the following order: DM, DM<sub>R</sub>, D<sub>R</sub>M<sub>R</sub>, UC, and Rapa.

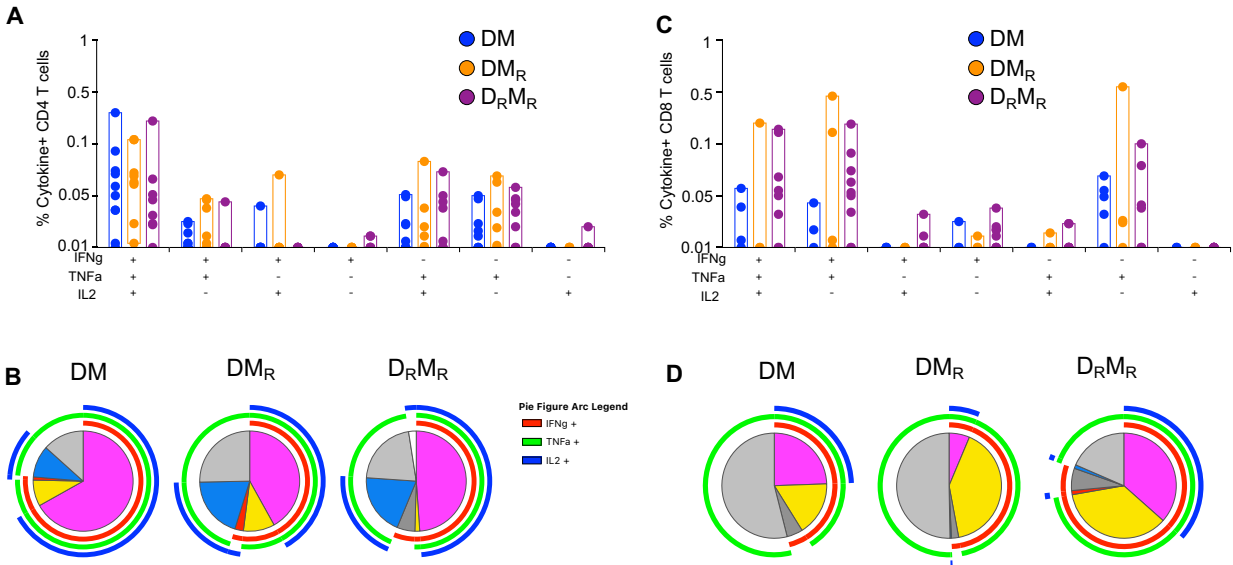

**Figure S6. Polyfunctionality of Gag-specific CD4 and CD8 T cells at week 12 post 2<sup>nd</sup> MVA boost in blood of vaccinated animals. (A, C)** The magnitude of triple, double and single cytokine+ cells as a percent of total (A) CD4 or (C) CD8 T cells. Each dot represents an individual monkey. **(B, D)** The relative distribution of triple, double and single cytokine+ cells as a percent of total cytokine+ (B) CD4 or (D) CD8 T cells. For the pie graphs, the mean value for each subset for all animals in a group is plotted.

| Group | red A01+<br>Monkey | Challenge #<br>infected | Macaque Genotypes |      |      | Group | Monkey | Challenge #<br>infected | Macaque Genotypes |      |      |
|-------|--------------------|-------------------------|-------------------|------|------|-------|--------|-------------------------|-------------------|------|------|
|       |                    |                         | A*01              | B*08 | B*17 |       |        |                         | A*01              | B*08 | B*17 |
| DM    | RKc12              | 2                       | +                 | -    | -    | DRMR  | RHy11  | 7                       | +                 | -    | -    |
| DM    | RDm13              | 2                       | +                 | -    | -    | DRMR  | RMz11  | 5                       | +                 | -    | -    |
| DM    | RJh13              | UI                      | -                 | +    | -    | DRMR  | RMn13  | 1                       | -                 | -    | -    |
| DM    | RAq12              | 4                       | +                 | -    | -    | DRMR  | RNv12  | 4                       | -                 | -    | -    |
| DM    | RQy12              | 1                       | +                 | -    | -    | DRMR  | RAw12  | 4                       | -                 | -    | -    |
| DM    | RYr12              | 7                       | -                 | -    | -    | DRMR  | RPh12  | 3                       | +                 | -    | -    |
| DM    | RLs12              | UI                      | -                 | -    | +    | DRMR  | RCv12  | 2                       | +                 | -    | -    |
| DM    | RSa12              | 1                       | -                 | -    | -    | DRMR  | REd13  | 2                       | -                 | +    | -    |
| DM    | RBI12              | 1                       | -                 | -    | -    | DRMR  | RIt12  | 3                       | -                 | -    | -    |
| DM    | RNh13              | 2                       | -                 | -    | -    | DRMR  | RJo12  | 3                       | -                 | -    | +    |
| DMR   | RRI12              | 2                       | +                 | -    | -    | UC    | RQk13  | 1                       | -                 | -    | -    |
| DMR   | RUp12              | 2                       | +                 | -    | -    | UC    | RRc13  | 2                       | -                 | -    | -    |
| DMR   | RJz12              | 2                       | +                 | -    | -    | UC    | REn13  | 2                       | -                 | -    | -    |
| DMR   | RAr12              | 3                       | +                 | -    | -    | UC    | RUf13  | 2                       | -                 | -    | -    |
| DMR   | RBs12              | 1                       | -                 | -    | -    | UC    | REm13  | 7                       | -                 | -    | -    |
| DMR   | RTt12              | 2                       | -                 | -    | -    | UC    | RZn13  | 6                       | -                 | -    | -    |
| DMR   | REq12              | 2                       | -                 | -    | -    | UC    | RYk13  | 1                       | +                 | -    | -    |
| DMR   | Rlu12              | 6                       | -                 | +    | -    | UC    | REh13  | 2                       | +                 | -    | -    |
| DMR   | RFI12              | 2                       | -                 | -    | +    | UC    | RQi13  | 3                       | +                 | -    | -    |
| DMR   | RFf12              | 2                       | -                 | -    | -    | UC    | RMr13  | 1                       | +                 | -    | -    |
|       |                    |                         |                   |      |      | R     | RBr12  | 1                       | -                 | +    | -    |
|       |                    |                         |                   |      |      | R     | RCr12  | 1                       | -                 | -    | -    |
|       |                    |                         |                   |      |      | R     | RRz11  | UI                      | -                 | -    | -    |
|       |                    |                         |                   |      |      | R     | RKt12  | 5                       | -                 | -    | -    |

**Table S1.** The Mamu typing information for study animals along with the challenge number at which an animal was productively infected. UI, uninfected.
